# Supplementary material for: Inflammasome-dependent IL-1β release depends upon membrane permeabilisation
Source: PubMed Central journal article supplement (PMC4946890; doi:10.1038/cdd.2015.176), 2016-02-12

**A**

Punicalagin (MW 1084 g/mol)

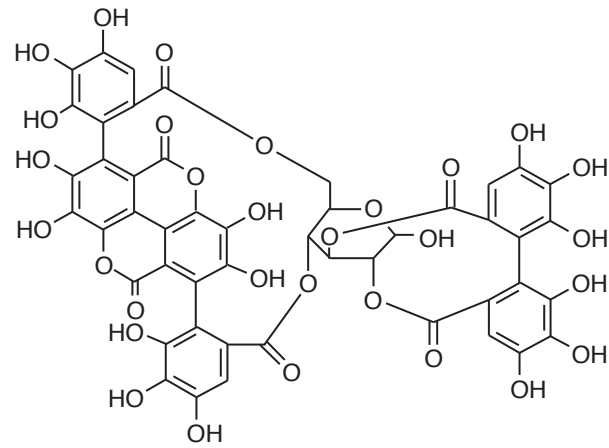

Punicalin (MW 782 g/mol)

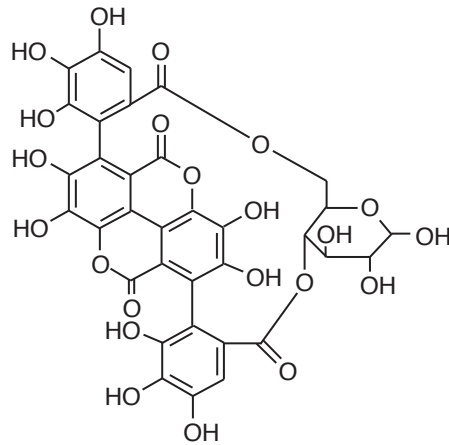

Ellagic acid (MW 302 g/mol)

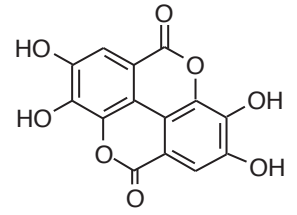

Urolithin A (MW 228 g/mol)

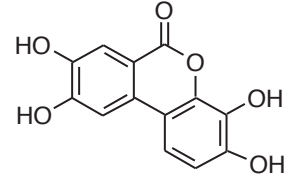**B**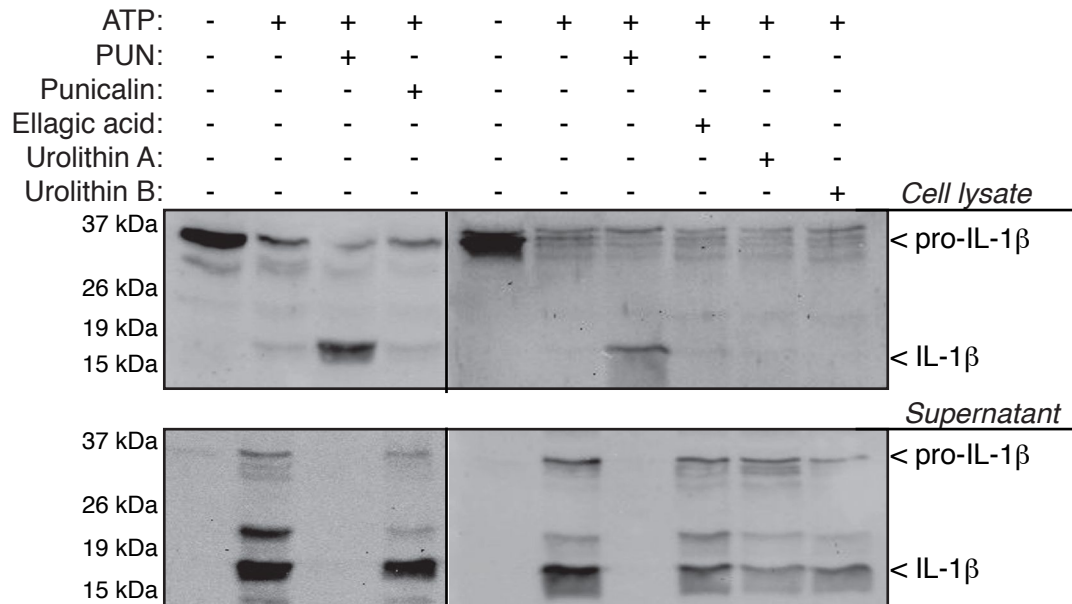**C**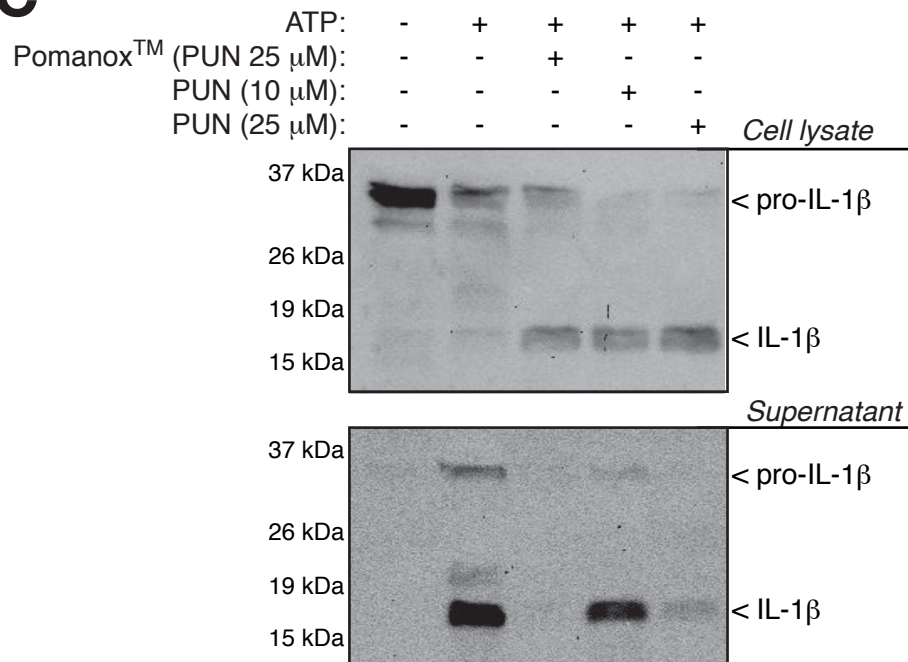

Supplement: cdd2015176x2.pdf [file cdd2015176x2.pdf]
