# Supplementary material for: Inflammasome-dependent IL-1β release depends upon membrane permeabilisation
Source: PubMed Central journal article supplement (PMC4946890; doi:10.1038/cdd.2015.176), 2016-02-12

**A**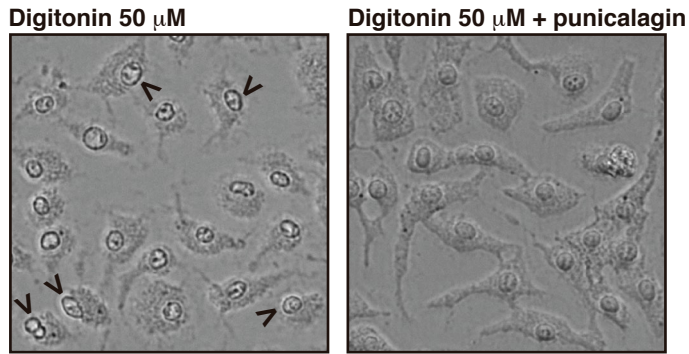**B**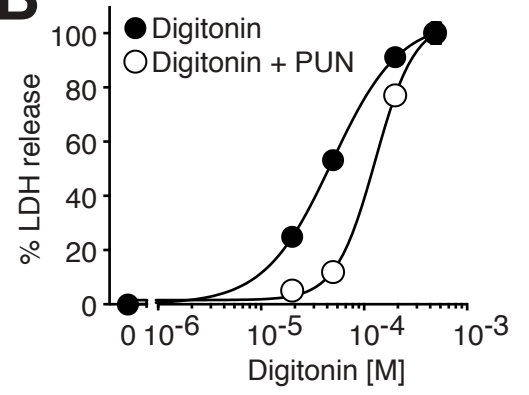**C**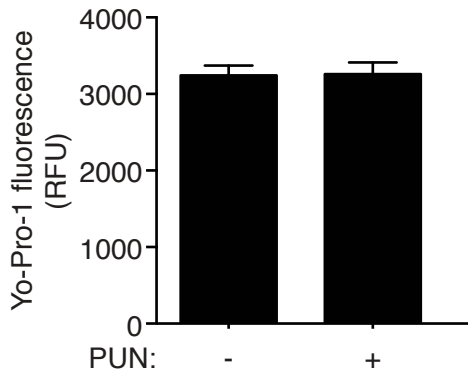**D**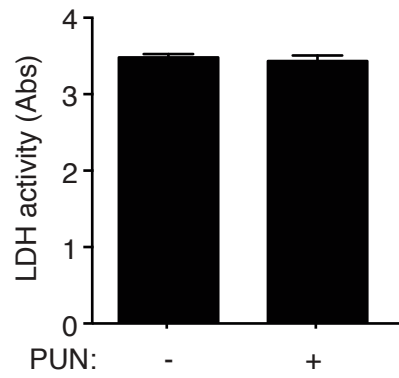**E**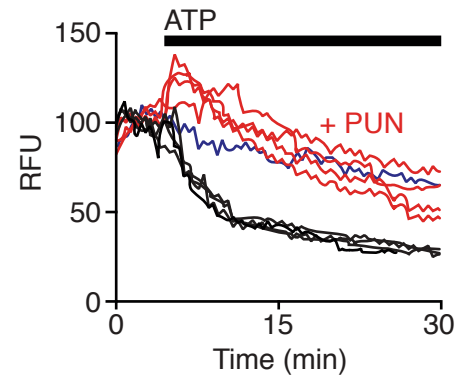

Supplement: cdd2015176x3.pdf [file cdd2015176x3.pdf]
