# Supplementary material for: Inflammasome-dependent IL-1β release depends upon membrane permeabilisation
Source: PubMed Central journal article supplement (PMC4946890; doi:10.1038/cdd.2015.176), 2016-02-12

**A**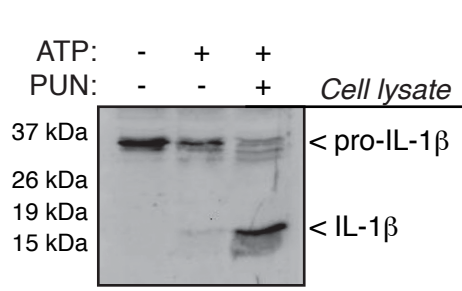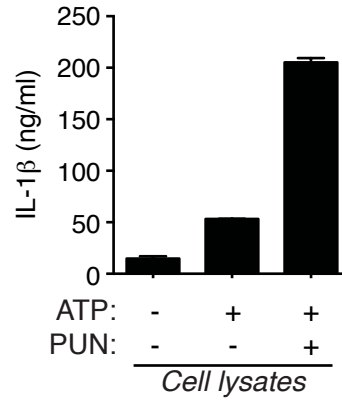**B**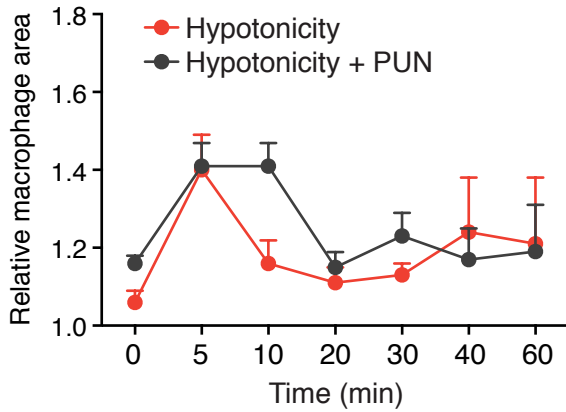**C**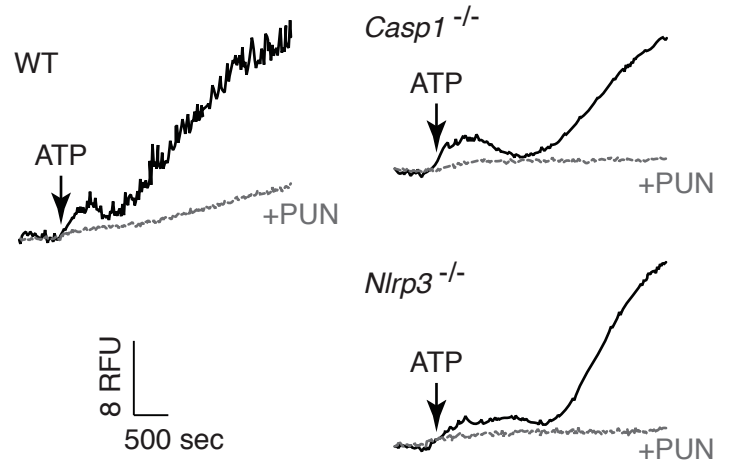**D**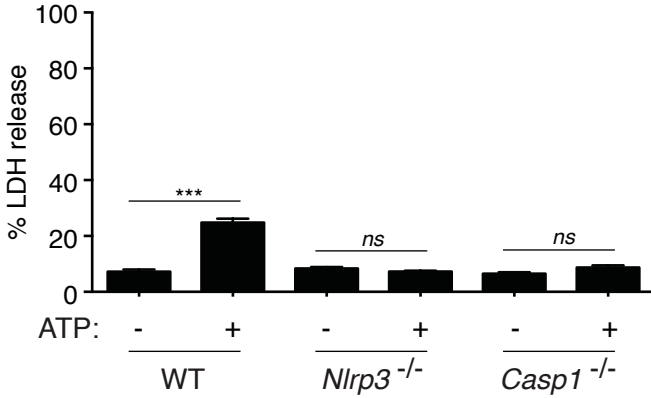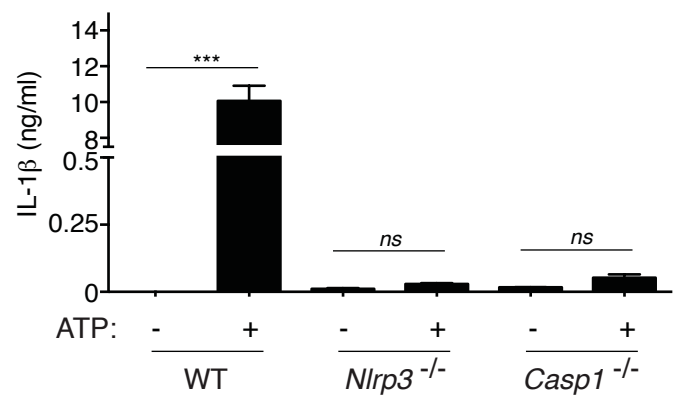**E**

|                          |   |   |   |
|--------------------------|---|---|---|
| 1 <sup>st</sup> ATP+PUN: | + | + | + |
| washout:                 | + | + | + |
| 2 <sup>nd</sup> PUN:     | - | + | - |
| 2 <sup>nd</sup> Glycine: | - | - | + |

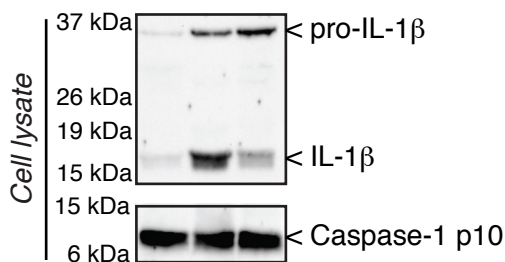

|                          |   |   |   |
|--------------------------|---|---|---|
| 1 <sup>st</sup> ATP+PUN: | + | + | + |
| washout:                 | + | + | + |
| 2 <sup>nd</sup> PUN:     | - | + | - |
| 2 <sup>nd</sup> Glycine: | - | - | + |

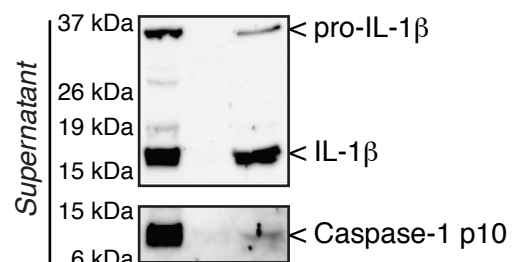

Supplement: cdd2015176x4.pdf [file cdd2015176x4.pdf]
